# Supplementary material for: Probing the Rare Biosphere of the North-West Mediterranean Sea: An Experiment with High Sequencing Effort
Source: PubMed Central journal article supplement (PMC4956085; doi:10.1371/journal.pone.0159195), 2016-07-21
Supplement: pone.0159195.s001.pdf [file pone.0159195.s001.pdf]

24 values were calculated as described above assuming lower-than-random count statistics  
25 as an alternative hypothesis.

26 These tests were also repeated using a bootstrap method, thus avoiding the need to  
27 assume a parametric distribution. To do this, a vector of 9 species counts was randomly  
28 resampled *with* replacement from the observed species count vector. This was repeated  
29 over 9999 bootstraps and bootstrap p-values were calculated as  $(1 + \#(t_s \leq t))/10000$  or  
30  $(1 + \#(t_s \geq t))/10000$ , again following Davison and Hinkley (1997).

31

32

33 References for the supporting information text:

34

- 35 1. Davison A, Hinkley D. Bootstrap methods and their applications. New York:  
36 Cambridge University Press; 1997.

37

38

39

40

41

41 **Figure A.** Goodness-of-fit of the best-approximating Sichel distribution to (A) surface  
42 and (B) bottom HTS datasets. Observed and predicted count frequencies (numbers of  
43 OTUs with a given sample abundance) are plotted against read counts (sample  
44 abundances) on a log-log scale. Goodness-of-fit is illustrated by the closeness of the  
45 predicted frequencies (posterior means, solid lines) to the observed frequencies (dots) as  
46 well as by the narrowness of the 95% prediction intervals (dashed lines) while still  
47 containing most of the data. The comparison is restricted to rare counts in the range  
48 1–100 because these are likely the most important for estimating total richness and  
49 required sequencing effort, and because the computation of stable frequency prediction  
50 intervals for higher counts would require too many simulations (the intervals shown used  
51 3000). The distributions were however fitted to the full range of observed count  
52 frequencies ( $f_{1-178569}$  and  $f_{1-45414}$  for surface and bottom samples respectively).  
53

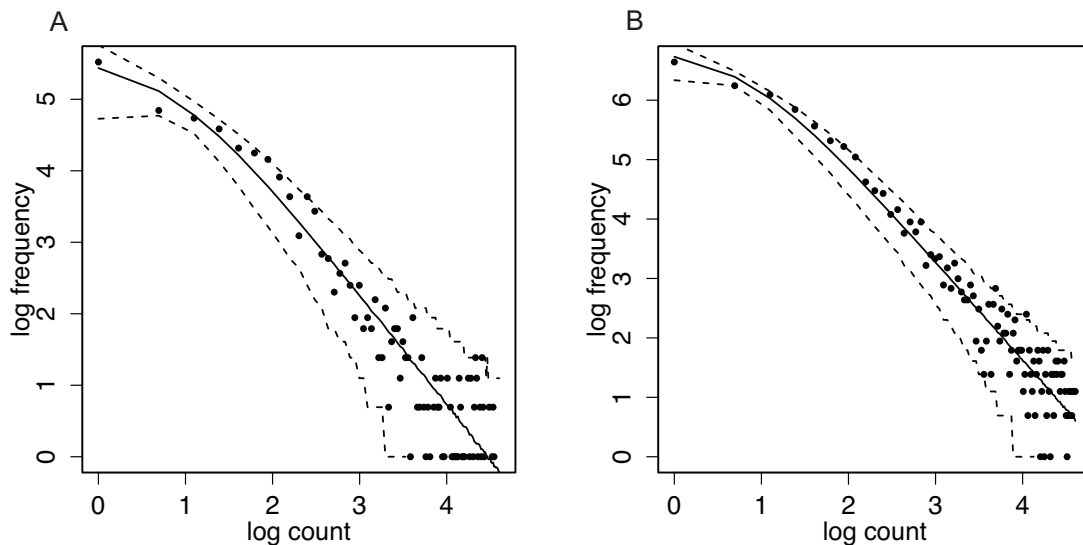

54

55 **Table A.** Four different compound Poisson distributions were fitted to the surface and  
56 bottom HTS data: the Poisson log-normal, the Poisson inverse Gaussian, the Poisson log-  
57 student, and the Poisson generalized inverse Gaussian (Sichel) distribution. As a  
58 robustness check we reran the Sichel fit for the surface sample excluding the counts of  
59 the most abundant species which, for this sample, was more than 3 times as abundant as  
60 the second most abundant species (see Surface\*). The relative goodness-of-fit is assessed  
61 using Akaike's Information Criterion ( $AICc = -2 \times \max(\log \text{likelihood}) + 2p +$   
62  $2p(p+1)/(n-p-1)$ , where  $p$  is the number of fitted parameters and  $n$  is the number of data;  
63 Hurvich and Tsai, 1989; Burnham and Anderson, 2002) and the deviance information  
64 criterion ( $DIC = -2 \times \text{posterior mean}(\log \text{likelihood}) + p$ ; Spiegelhalter *et al.*, 2002;  
65 Quince *et al.*, 2008). For the robustness check the selection criteria are placed in square  
66 parentheses since these cannot be compared to other rows. We also show the total  
67 species richness estimates from maximum likelihood ( $\hat{S}_{ML}$ ) as well as the posterior  
68 median ( $\hat{S}_{50\%}$ ) and the 95% credible bounds ( $\hat{S}_{2.5\%}$  and  $\hat{S}_{97.5\%}$ ) from the Bayesian MCMC  
69 method (Quince *et al.* 2008).  
70 Reference: Hurvich, C.M. and Tsai, C.-L. (1989) Regression and time series model  
71 selection in small samples. *Biometrika* 76: 297-307.

72

73

| Distribution | No. fitted parameters<br>$p$ | Sample   | min<br>(-log lik) | AICc     | DIC    | $\hat{S}_{\max. \text{lik.}}$ | $\hat{S}_{\text{posterior mean}}$ | $\hat{S}_{50\%}$ | $\hat{S}_{2.5\%}$ | $\hat{S}_{97.5\%}$ |
|--------------|------------------------------|----------|-------------------|----------|--------|-------------------------------|-----------------------------------|------------------|-------------------|--------------------|
| Log-normal   | 3                            | Surface  | 869.4             | 1744.8   | 1744.8 | 2449                          | 2501                              | 2488             | 2238              | 2819               |
| Log-student  | 4                            | Surface  | 840.6             | 1689.1   | 1689.3 | 1869                          | 1897                              | 1891             | 1797              | 2027               |
| Inverse      | 3                            | Surface  | 836.9             | 1679.8   | 1679.9 | 1644                          | 1644                              | 1643             | 1594              | 1702               |
| Sichel       | 4                            | Surface  | 834.7             | 1677.4   | 1677.3 | 1618                          | 1615                              | 1614             | 1568              | 1669               |
| Sichel       | 4                            | Surface* | [821.3]           | [1650.7] | [1651] | 1619                          | 1616                              | 1615             | 1568              | 1671               |
| Log-normal   | 3                            | Bottom   | 1276.9            | 2559.8   | 2559.8 | 6843                          | 6856                              | 6850             | 6544              | 7199               |
| Log-student  | 4                            | Bottom   | 1198.0            | 2404.1   | 2404.1 | 5850                          | 5867                              | 5863             | 5701              | 6055               |
| Inverse      | 3                            | Bottom   | 1230.0            | 2466.0   | 2466.0 | 5352                          | 5353                              | 5352             | 5250              | 5463               |
| Sichel       | 4                            | Bottom   | 1176.9            | 2361.8   | 2362.1 | 5118                          | 5109                              | 5108             | 5027              | 5196               |

74

75

76

77

78

79

80

81 **Table B.** Semiparametric functional fits to surface sample collector's curve data and  
82 corresponding estimates of total species richness. A set of 12 convex, saturating  
83 functions were fitted to the rarefied species accumulation curve, sampled at intervals of  
84 1000 reads (hence 502 data points), using the nonlinear least squares function "nls" in R  
85 to estimate the parameters a, b etc. The absolute quality of the fits was measured using  
86 the generalized R<sup>2</sup> values (defined for nonlinear fit as  $1 - \text{RSS}/\text{SSM}$ , where RSS is the  
87 residual sum of squares and SSM is the sum of squares of the sample mean). The best-  
88 approximating model was selected as that which minimized Akaike's Information  
89 Criterion (AICc, in this case the Power Michaelis Menten (2) function was selected). The  
90 selected model was then used to estimate the total sample richness S as the asymptotic  
91 value of the function at  $x = \text{Inf}$  (final column shows the estimates for all candidate  
92 functions). Required sequencing effort (not shown) was predicted by inverting the  
93 selected function for x such that the value of the function was 0.9 times the estimated  
94 sample richness. Note that for certain 3 and 4 parameter functions the R<sup>2</sup> values are  
95 extremely high and differ only in the fourth or fifth decimal places ( $R^2 > 0.999$ ) yet the  
96 estimated richness can differ substantially (cf. Power Michaelis Menten (2) vs. Weibull  
97 Cumulative). For such functions, the AICc values also tend to differ by relatively large  
98 amounts, such that a model averaging strategy based on AIC weights would differ little  
99 from simply choosing the lowest-AICc model (Burnham and Anderson, 2002), and any  
100 assessment of model selection uncertainty based on AIC-weights is unlikely to predict the  
101 level of selection uncertainty observed in simulations (see Table S3). This latter is likely  
102 the result of the neglected error correlation in the functional fits.

| Function                            | Formula<br>(x = #reads-1) | Number of<br>Parameters | R <sup>2</sup> | AICc | Ŝ    |
|-------------------------------------|---------------------------|-------------------------|----------------|------|------|
| Michaelis Menten                    | $(ax)/(b+x)+1$            | 2                       | 0.98414        | 4976 | 1520 |
| Negative Exponential                | $a(1-\exp(-bx))+1$        | 2                       | 0.93681        | 5670 | 1317 |
| Power Michaelis Menten (1)          | $ax^c/(b+x^c)+1$          | 3                       | 0.99977        | 2856 | 1927 |
| Power Michaelis Menten (2)          | $ax^c/(b+x)^c+1$          | 3                       | 0.99995        | 2086 | 1679 |
| Power Negative Exponential          | $a(1-\exp(-bx))^c+1$      | 3                       | 0.99947        | 3274 | 1459 |
| Weibull Cumulative                  | $a(1-\exp(-bx))^c$        | 3                       | 0.99992        | 2323 | 1568 |
| Michaelis Menten + offset           | $(ax)/(b+x)+1+c$          | 3                       | 0.99680        | 4174 | 1590 |
| Negative Exponential + offset       | $a(1-\exp(-bx))+1+c$      | 3                       | 0.98639        | 4901 | 1373 |
| Power Michaelis Menten (1) + offset | $ax^c/(b+x^c)+1+d$        | 4                       | 0.99988        | 2545 | 1864 |
| Power Michaelis Menten (2) + offset | $ax^c/(b+x)^c+1+d$        | 4                       | 0.99995        | 2088 | 1679 |
| Power Negative Exponential          | $a(1-\exp(-bx))^c+1+d$    | 4                       | 0.99957        | 3169 | 1467 |
| Weibull Cumulative + offset         | $a(1-\exp(-bx))^c+d$      | 4                       | 0.99992        | 2316 | 1565 |

103 **Table C.** Semiparametric functional fits to bottom sample collector's curve data and  
104 corresponding estimates of total species richness. A set of 12 convex, saturating  
105 functions were fitted to the rarefied species accumulation curve, sampled at intervals of  
106 1000 reads (hence 576 data points), using the nonlinear least squares function "nls" in R  
107 to estimate the parameters a, b etc. The absolute quality of the fits was measured using  
108 the generalized R<sup>2</sup> values (defined for nonlinear fit as  $1 - \text{RSS}/\text{SSM}$ , where RSS is the  
109 residual sum of squares and SSM is the sum of squares of the sample mean). The best-  
110 approximating model was selected as that which minimized Akaike's Information  
111 Criterion (AICc, in this case the Power Michaelis Menten (2) + offset function was  
112 selected). The selected model was then used to estimate the total sample richness S as the  
113 asymptotic value of the function at  $x = \text{Inf}$  (final column shows the estimates for all  
114 candidate functions). Required sequencing effort (not shown) was predicted by inverting  
115 the selected function for x such that the value of the function was 0.9 times the estimated  
116 sample richness. Note that for certain 3 and 4 parameter functions the R<sup>2</sup> values are  
117 extremely high and differ only in the fourth or fifth decimal places ( $R^2 > 0.999$ ) yet the  
118 estimated richnesses can differ substantially (cf. Power Michaelis Menten (2) vs. Weibull  
119 Cumulative). For such functions, the AICc values also tend to differ by relatively large  
120 amounts, such that a model averaging strategy based on AIC weights would differ little  
121 from simply choosing the lowest-AICc model (Burnham and Anderson, 2002), and any  
122 assessment of model selection uncertainty based on AIC-weights is unlikely to predict the  
123 level of selection uncertainty observed in simulations (see Table S3). This latter is likely  
124 the result of the neglected error correlation in the functional fits.



| Function                            | Formula                | Number of Parameters | R <sup>2</sup> | AICc | Ŝ    |
|-------------------------------------|------------------------|----------------------|----------------|------|------|
| Michaelis Menten                    | $(ax)/(b+x)+1$         | 2                    | 0.98873        | 6899 | 4947 |
| Negative Exponential                | $a(1-\exp(-bx))+1$     | 2                    | 0.95179        | 7737 | 4224 |
| Power Michaelis Menten (1)          | $ax^c/(b+x^c)+1$       | 3                    | 0.99986        | 4380 | 6122 |
| Power Michaelis Menten (2)          | $ax^c/(b+x)^c+1$       | 3                    | 0.99999        | 2897 | 5425 |
| Power Negative Exponential          | $a(1-\exp(-bx))^c+1$   | 3                    | 0.99959        | 4996 | 4666 |
| Weibull Cumulative                  | $a(1-\exp(-bx)^c)$     | 3                    | 0.99999        | 3062 | 4981 |
| Michaelis Menten + offset           | $(ax)/(b+x)+1+c$       | 3                    | 0.99758        | 6014 | 5157 |
| Negative Exponential + offset       | $a(1-\exp(-bx))+1+c$   | 3                    | 0.98893        | 6891 | 4397 |
| Power Michaelis Menten (1) + offset | $ax^c/(b+x^c)+1+d$     | 4                    | 0.99992        | 4081 | 5971 |
| Power Michaelis Menten (2) + offset | $ax^c/(b+x)^c+1+d$     | 4                    | 0.99999        | 2566 | 5435 |
| Power Negative Exponential          | $a(1-\exp(-bx))^c+1+d$ | 4                    | 0.99974        | 4729 | 4702 |
| Weibull Cumulative + offset         | $a(1-\exp(-bx)^c)+d$   | 4                    | 0.99999        | 2924 | 4996 |

1 **Table D.** Simulation-based tests of estimator performance, considering estimates of both  
2 the total species richness (S) and the required sequencing effort (RSE) i.e. number of  
3 final reads required to observe a given fraction of the total richness in a new sample (e.g.  
4 0.7S means 70% of the total richness). For each of four parametric distributions (Table  
5 D1) Poisson log-normal, Poisson log-student and Table D2 Poisson inverse-Gaussian,  
6 and Sichel) an ensemble of 80 sets of community abundances were randomly sampled  
7 from the parametric distribution; species data were then simulated by sampling from  
8 multinomial distributions with probabilities defined by the community abundances for  
9 each ensemble member. Distribution parameter values, including the total species  
10 richness, were also varied between ensemble members by sampling from the posterior  
11 distributions fitted to the observed data. Estimator performance is summarized by the  
12 %BIAS (ensemble average of estimate minus true value) and %RMSE (root-mean-square  
13 error), normalizing by the ensemble mean of the true value in both cases. Non-  
14 parametric species richness estimators included the Chao1 lower bound estimate (Chao,  
15 1984), the coverage-based estimator for highly heterogeneous communities (ACE-1;  
16 Chao and Lee, 1992; Chao *et al.*, 2000) and the bias-corrected Chao estimate iChao (Chiu  
17 *et al.*, 2014). The ACE-1 estimator was tested using two values of the cut-off count k to  
18 define "rare" species: the default value k = 10 and a larger value k = 100 as recommended  
19 by Chao and Shen (2012) for microbial communities (note, the estimated CV of the  
20 "rare" species was < 0.8 for k = 10 but > 0.8 for k = 100, where 0.8 is a threshold above  
21 which Chao and Shen (2012) recommend ACE-1 in preference to ACE). RSE was  
22 estimated for each nonparametric estimator by inverting the expression in Table 1 of  
23 Chao *et al.* (2014) and substituting the corresponding estimates of the zero-count

1 frequency  $f_0 = (S - S_{\text{obs}})$  (using ACE-1 this is identical to the method proposed in Chao  
2 and Shen (2012) based on Shen *et al.* (2003) except for a negligible bias correction).  
3 Similar results (not shown) were obtained by substituting into equation (12) in Chao *et al.*  
4 (2009) (see also Colwell *et al.*, 2012, equation 11). A semi-parametric AICc-selected  
5 estimator SP (AICc) was constructed by fitting 12 different functions to the collector's  
6 curves (rarefied species richness vs. sampling effort) and choosing the function with the  
7 lowest Akaike's Information Criterion (AICc). Total richness was then estimated as the  
8 asymptotic value of the selected function (see Table S2), and RSE was estimated by  
9 inverting the selected function for sampling effort given the required fraction of  
10 asymptotic richness. Nonparametric estimates were calculated using the R package  
11 SPECIES (Wang, 2011) and semiparametric functions were fitted using the nonlinear  
12 least squares function "nls" in R (R Core Team, 2013).

13

14

15

1 Table D1

2  
3

| Estimator        | Sample  | S(lognormal) |       | RSE(0.7S, lognormal) |       | S(logstudent) |       | RSE(0.8S, logstudent) |       |
|------------------|---------|--------------|-------|----------------------|-------|---------------|-------|-----------------------|-------|
|                  |         | %BIAS        | %RMSE | %BIAS                | %RMSE | %BIAS         | %RMSE | %BIAS                 | %RMSE |
| Chao             | Surface | -25.8        | 26.8  | -86.2                | 116.1 | -22.1         | 22.9  | -76.2                 | 90.1  |
| ACE-1<br>(k=10)  | Surface | -24.5        | 25.4  | -85.5                | 114.4 | -18.9         | 19.4  | -71.3                 | 84.0  |
| ACE-1<br>(k=100) | Surface | 0.9          | 4.3   | -21.0                | 54.4  | 50.2          | 60.0  | 95.2                  | 113.4 |
| iChao            | Surface | -23.4        | 24.5  | -84.8                | 114.1 | -19.1         | 19.9  | -72.1                 | 85.9  |
| SP(AICc)         | Surface | -1.0         | 4.5   | -6.2                 | 33.3  | -2.4          | 11.6  | -2.8                  | 70.3  |
| Chao             | Bottom  | -14.9        | 15.1  | -70.1                | 71.9  | -24.3         | 24.8  | -73.9                 | 81.3  |
| ACE-1            | Bottom  | -14.2        | 14.4  | -70.8                | 72.4  | -18.8         | 19.0  | -66.2                 | 72.6  |
| ACE-1<br>(k=100) | Bottom  | 7.5          | 8.1   | 54.1                 | 55.2  | 93.8          | 101.5 | 167.0                 | 178.3 |
| iChao            | Bottom  | -12.7        | 12.9  | -71.1                | 72.5  | -20.6         | 21.0  | -69.0                 | 76.4  |
| SP(AICc)         | Bottom  | 3.7          | 4.1   | 23.3                 | 27.5  | 3.6           | 10.0  | 31.3                  | 60.8  |

4  
5  
6  
7  
8  
9  
10  
11  
12  
13

1 Table D2

2

| Estimator        | Sample  | S(inverse Gaussian) |       | RSE<br>(0.9S, inverse Gaussian) |       | S(Sichel) |       | RSE(0.9S, Sichel) |       |
|------------------|---------|---------------------|-------|---------------------------------|-------|-----------|-------|-------------------|-------|
|                  |         | %BIAS               | %RMSE | %BIAS                           | %RMSE | %BIAS     | %RMSE | %BIAS             | %RMSE |
| Chao             | Surface | -5.7                | 6.6   | -36.6                           | 49.6  | -6.3      | 7.8   | -38.3             | 53.9  |
| ACE-1<br>(k=10)  | Surface | -3.5                | 4.2   | -26.9                           | 36.6  | -3.7      | 4.9   | -27.5             | 40.3  |
| ACE-1<br>(k=100) | Surface | 40.6                | 45.9  | 283.0                           | 313.4 | 53.2      | 60.5  | 323.0             | 361.5 |
| iChao            | Surface | -3.3                | 4.3   | -25.9                           | 39.2  | -3.6      | 5.5   | -27.5             | 43.8  |
| SP(AICc)         | Surface | 1.4                 | 6.8   | 81.6                            | 448.9 | 4.1       | 12.2  | 237.9             | 921.5 |
| Chao             | Bottom  | -5.9                | 6.0   | -33.5                           | 34.9  | -7.4      | 7.9   | -38.5             | 44.1  |
| ACE-1            | Bottom  | -3.7                | 3.8   | -23.8                           | 25.0  | -3.6      | 3.9   | -24.7             | 28.5  |
| ACE-1<br>(k=100) | Bottom  | 43.5                | 44.3  | 306.2                           | 309.8 | 76.0      | 81.2  | 396.9             | 416.9 |
| iChao            | Bottom  | -3.2                | 3.5   | -21.6                           | 23.3  | -4.2      | 4.8   | -27.2             | 33.0  |
| SP(AICc)         | Bottom  | 1.3                 | 7.1   | 51.6                            | 206.8 | 3.1       | 12.5  | 138.5             | 391.6 |

3
